# Supplementary material for: Implementation of a cardiac PET stress program: comparison of outcomes to the preceding SPECT era
Source: JCI journal article supplement (doi:10.1172/jci.insight.120949), 2018-05-02
Supplement: sd1 [file 1]

**Supplementary Table 1: MPI tests for the SPECT era and PET era**

|                                       | <b>SPECT era</b> | <b>PET era</b> |
|---------------------------------------|------------------|----------------|
| <b>Type of Stress Test</b>            | <b>n=6777</b>    | <b>n=7817</b>  |
| Pharmacologic stress SPECT            | 3333 (49.2%)     | 350 (4.5%)     |
| Exercise SPECT                        | 1693 (25.0%)     | 192 (2.5%)     |
| Combined pharmacologic/exercise SPECT | 1660 (24.5%)     | 138 (1.8%)     |
| PET                                   | NA               | 7078 (90.6%)   |
| Rest/Stress Only                      | 91 (1.3%)        | 59 (0.8%)      |

**Supplementary Table 2: Demographic and clinical characteristics of the patients for the SPECT Tests and PET Tests**

| Patient Characteristic            | SPECT Tests  | PET Tests    | pvalue  |
|-----------------------------------|--------------|--------------|---------|
|                                   | n=6686       | n=7130       |         |
| Age, mean (std) years             | 63.8 (12.8)  | 64.5 (12.7)  | 0.001   |
| Male, No. (%)                     | 3541 (53.0%) | 3929 (55.1%) | 0.012   |
| Caucasian, No. (%)                | 5886 (88.0%) | 6562 (92.0%) | <0.0001 |
| BMI, mean (std)                   | 31.2 (7.2)   | 31.9 (7.5)   | <0.0001 |
| Hypertension, No. (%)             | 4152 (62.1%) | 4553 (63.9%) | 0.033   |
| Hyperlipidemia, No. (%)           | 3724 (55.7%) | 4053 (56.8%) | 0.175   |
| Diabetes, No. (%)                 | 1951 (29.2%) | 2123 (29.8%) | 0.443   |
| Family History of CVD, No. (%)    | 3722 (55.7%) | 4207 (59.0%) | 0.0001  |
| Smoking History, No. (%)          | 2468 (36.9%) | 2638 (37.0%) | 0.300   |
| Prior MI, No. (%)                 | 1555 (23.3%) | 1588 (22.3%) | 0.167   |
| Heart Failure, No. (%)            | 1333 (19.9%) | 1650 (23.1%) | <0.0001 |
| Prior CAD, No. (%)                | 2451 (36.7%) | 2890 (40.5%) | <0.0001 |
| Prior CVA, No. (%)                | 695 (10.4%)  | 726 (10.2%)  | 0.681   |
| Prior PVD, No. (%)                | 389 (5.8%)   | 410 (5.8%)   | 0.865   |
| Inpatient, No. (%)                | 1719 (25.7%) | 1885 (26.4%) | 0.331   |
| Prior Revascularization, No. (%)  | 2085 (31.2%) | 2018 (28.3%) | 0.0002  |
| Prior Stress Test, No. (%)        | 1210 (18.1%) | 1243 (17.4%) | 0.307   |
| <b>Prior Medications, No. (%)</b> |              |              |         |
| ACE-I or ARB                      | 1327 (19.9%) | 2331 (32.7%) | <0.0001 |
| Aspirin                           | 1297 (19.4%) | 1470 (20.6%) | 0.07    |

|                             |              |              |         |
|-----------------------------|--------------|--------------|---------|
| Beta Blockers               | 1214 (18.2%) | 2058 (28.9%) | <0.0001 |
| Calcium Channel Blockers    | 5282 (7.8%)  | 919 (12.9%)  | <0.0001 |
| Anti-Platelet (non-Aspirin) | 409 (6.1%)   | 521 (7.3%)   | 0.001   |
| Statin                      | 1482 (22.2%) | 2586 (36.3%) | <0.0001 |
| Warfarin                    | 388 (5.8%)   | 712 (10.0%)  | <0.0001 |

**Supplementary Table 3: Outcomes for actual PET stress tests (n=7130) and SPECT tests (n=6686)**

| Outcomes                                 | PET vs SPECT N (%)         | Adjusted OR/HR    |         |
|------------------------------------------|----------------------------|-------------------|---------|
|                                          |                            | (95% CI)          | pvalue  |
| <b>60-day Coronary Angiography</b>       | 990 (13.9%) vs. 624 (9.3%) | 1.60 (1.43, 1.79) | <0.0001 |
| <b>60-day High Grade CAD</b>             | 785 (11.0%) vs. 441 (6.6%) | 1.89 (1.66, 2.15) | <0.0001 |
| <b>Left Main/Severe 3-Vessel Disease</b> | 39 (0.55%) vs 22 (0.33%)   | 1.74 (1.02, 2.99) | 0.0439  |
| <b>60-day Revascularization</b>          | 564 (7.9%) vs. 288 (4.3%)  | 2.05 (1.76, 2.40) | <0.0001 |
| <b>MACE - Revascularization</b>          | 403 (5.7%) vs. 347 (5.2%)  | 1.01 (0.87, 1.17) | 0.92    |

**Supplementary Table 4: Demographic and clinical characteristics for PET era and SPECT era by one-year MACE-Revascularization outcome.**

| Patient Characteristic                        | SPECT era one-year MACE Revasc |                       | PET era one-year MACE Revasc |                        |
|-----------------------------------------------|--------------------------------|-----------------------|------------------------------|------------------------|
|                                               | No (n=6418)                    | Yes (n=359)           | No (n=7367)                  | Yes (n=450)            |
| <b>Age, mean (std) years</b>                  | 63.4 (12.8)                    | 70.3 (12.5)           | 63.89 (12.6)                 | 70.1 (12.6)            |
| <b>Male, No. (%)</b>                          | 3382 (52.7%)                   | 220 (61.3%)           | 4072 (55.3%)                 | 275 (61.1%)            |
| <b>Caucasian*, No. (%)</b>                    | 5671 (94.6%)                   | 294 (96.1%)           | 6767 (94.7%)                 | 413 (93.9%)            |
| <b>BMI, mean (std)</b>                        | 31.3 (7.2)                     | 29.8 (7.2)            | 31.8 (7.4)                   | 29.6 (7.0)             |
| <b>Hypertension, No. (%)</b>                  | 3978 (62.0%)                   | 230 (64.1%)           | 4626 (62.8%)                 | 304 (67.6%)            |
| <b>Hyperlipidemia, No. (%)</b>                | 3569 (55.6%)                   | 197 (54.9%)           | 4100 (55.7%)                 | 243 (54.0%)            |
| <b>Diabetes, No. (%)</b>                      | 1831 (28.5%)                   | 155 (43.2%)           | 2118 (28.8%)                 | 209 (46.4%)            |
| <b>Family History of CVD, No. (%)</b>         | 3567 (55.6%)                   | 194 (54.0%)           | 4282 (58.1%)                 | 258 (57.3%)            |
| <b>Smoking History, No. (%)</b>               | 4070 (63.4%)                   | 205 (57.1%)           | 4647 (63.1%)                 | 254 (56.4%)            |
| <b>Prior MI, No. (%)</b>                      | 1424 (22.2%)                   | 168 (46.8%)           | 1481 (20.1%)                 | 181 (40.2%)            |
| <b>Heart Failure, No. (%)</b>                 | 1196 (18.6%)                   | 184 (51.3%)           | 1513 (20.5%)                 | 223 (49.6%)            |
| <b>Prior CAD, No. (%)</b>                     | 2272 (35.4%)                   | 232 (64.6%)           | 2752 (37.4%)                 | 294 (65.3%)            |
| <b>Prior CVA, No. (%)</b>                     | 628 (9.8%)                     | 75 (20.9%)            | 692 (9.4%)                   | 71 (15.8%)             |
| <b>Prior PVD, No. (%)</b>                     | 335 (5.2%)                     | 61 (17.0%)            | 372 (5.1%)                   | 71 (15.8%)             |
| <b>Inpatient, No. (%)</b>                     | 1584 (24.7%)                   | 185 (51.5%)           | 1743 (23.7%)                 | 239 (53.1%)            |
| <b>Prior Revascularization, No. (%)</b>       | 1923 (30.0%)                   | 202 (56.3%)           | 1904 (25.8%)                 | 211 (46.9%)            |
| <b>Prior Stress Test, No. (%)</b>             | 1136 (17.7%)                   | 91 (25.4%)            | 1234 (16.8%)                 | 105 (23.3%)            |
| <b>Discharge Medications, No. (%)</b>         |                                |                       |                              |                        |
| ACE-I or ARB                                  | 1703 (26.5%)                   | 135 (37.6%)           | 2773 (35.5%)                 | 175 (38.9%)            |
| Aspirin                                       | 2061 (32.1%)                   | 194 (54.0%)           | 2400 (32.6%)                 | 250 (55.6%)            |
| Beta Blockers                                 | 1796 (28.0%)                   | 177 (49.3%)           | 2870 (39.0%)                 | 256 (56.9%)            |
| Calcium Channel Blockers                      | 653 (10.2%)                    | 44 (12.3%)            | 1113 (15.1%)                 | 96 (21.3%)             |
| Anti-Platelet (non-Aspirin)                   | 531 (8.3%)                     | 79 (22.0%)            | 753 (10.2%)                  | 113 (25.1%)            |
| Statin                                        | 1944 (30.3%)                   | 178 (49.6%)           | 3425 (46.5%)                 | 270 (60.0%)            |
| Warfarin                                      | 475 (7.4%)                     | 42 (11.7%)            | 904 (12.3%)                  | 86 (19.1%)             |
| <b>60-day Outcomes</b>                        |                                |                       |                              |                        |
| Coronary Angiography                          | 580 (9.0%)                     | 78 (21.7%)            | 913 (12.4%)                  | 120 (26.7%)            |
| High-Grade Obstructive CAD†                   | 393 (6.1% /<br>67.8%)          | 74 (20.6% /<br>94.9%) | 709 (9.6% /<br>77.7%)        | 108 (24.0% /<br>90.0%) |
| Left Main Disease or Severe 3-Vessel Disease† | 135 (2.1% /<br>23.3%)          | 40 (11.1% /<br>51.3%) | 219 (3.0% /<br>24.0%)        | 42 (9.3% /<br>35.0%)   |
| Revascularization†                            | 253 (3.9% /<br>43.6%)          | 57 (15.9% /<br>73.1%) | 513 (7.0% /<br>56.2%)        | 73 (16.2% /<br>60.8%)  |

\*Note: percentage based on total reporting with unknowns removed (n=5992, n=306, n=7144, n=440, respectively). † two reported percentage based on totals / those undergoing angiography.

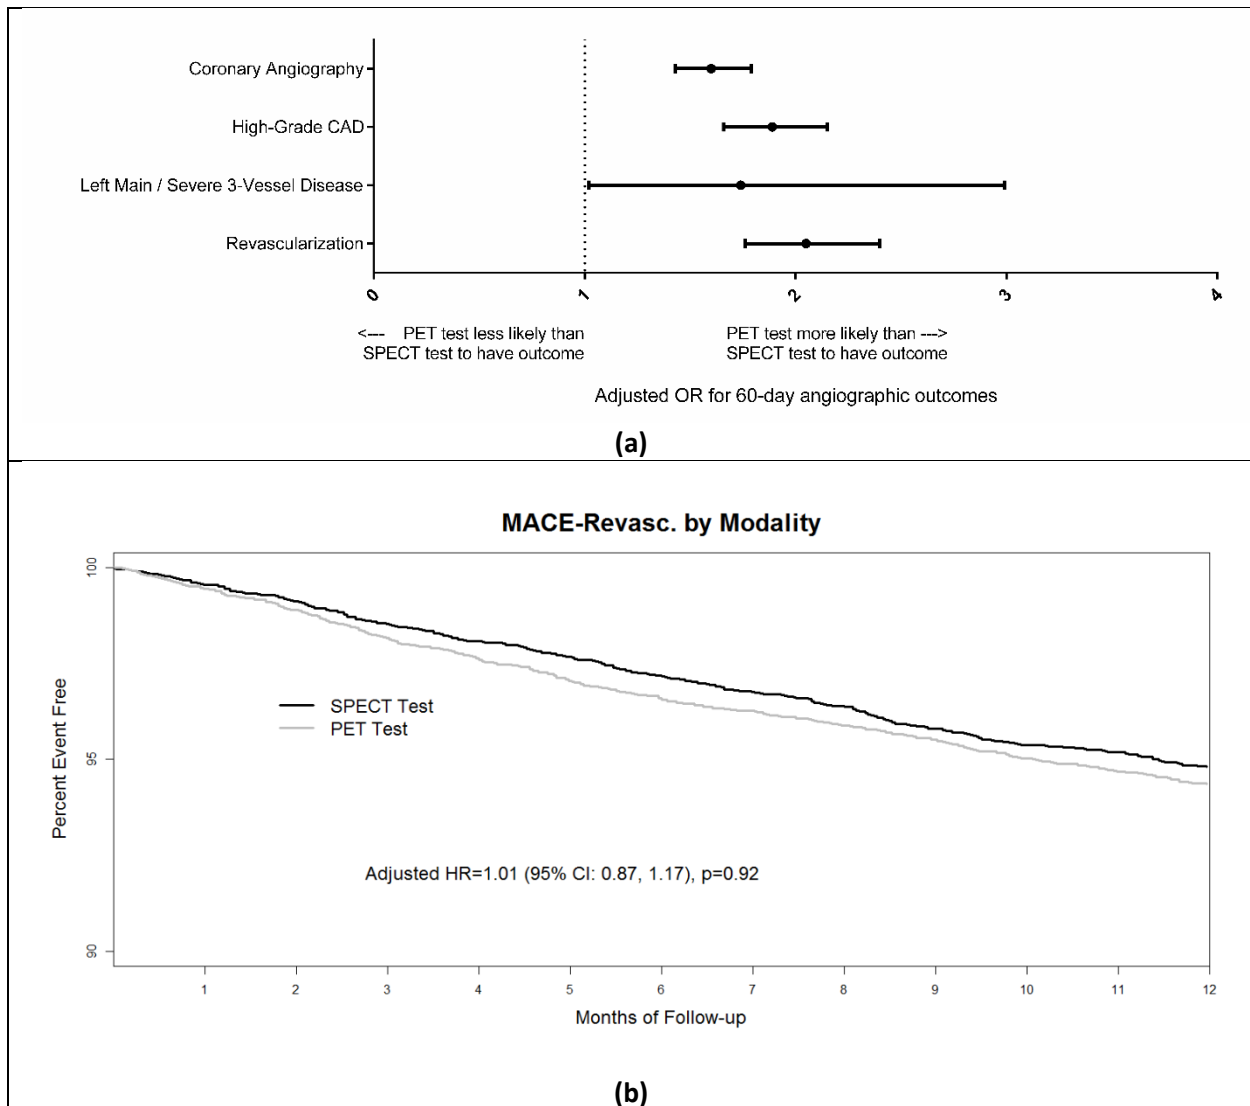

**Supplementary Figure 1: Adjusted odds ratio for the 60-day angiographic outcomes (a) and the one-year MACE-Revascularization outcomes (b) the PET test compared to SPECT test**

After adjustment in a logistic regression model for baseline differences (age, gender, race, body mass index, history of hypertension, family history of CVD, history of heart failure, prior revascularization, and medications -ACE or ARB, beta blocker, calcium channel blocker, anti-platelet, statin, and warfarin), patients that had a PET test (n=7130) compared to a SPECT test (n=6686) were more likely to have 60-day coronary angiography. High-grade obstructive coronary artery disease (CAD) and left main or severe 3-vessel disease was identified more frequently in PET tests, associated with higher rates of or revascularization (a). The rates of one-year MACE-Revascularization (including all-cause death, myocardial infarction, and after 60-day revascularization), after adjustment in Cox's proportional hazard model, were similar between the PET and SPECT tests (b).
